# Supplementary material
Source: PubMed Central journal article supplement (PMC9319029)
Supplement: NIHMS1825278-supplement-Sup_Doc.pdf [file NIHMS1825278-supplement-Sup_Doc.pdf]

## Supporting Information II

### Comparison of In-Solution, FASP, and S-Trap Based Digestion Methods for Bottom-Up Proteomic Studies

Katelyn R. Ludwig<sup>1,2</sup>, Monica M. Schroll<sup>1,2</sup>, and Amanda B. Hummon<sup>2\*</sup>

<sup>1</sup>Department of Chemistry and Biochemistry, University of Notre Dame, Notre Dame, IN

<sup>2</sup>Department of Chemistry and Biochemistry, The Ohio State University, Columbus, OH

\*Corresponding author

Amanda B. Hummon: Tel.: +1-614-688-2580 E-mail address: [hummon.1@osu.edu](mailto:hummon.1@osu.edu)

#### Table of Contents:

Supplemental Figure 1: Analysis of peptide trends. (A) Peptides were binned by I isoelectric point and their cumulative distribution for each method was plotted. (B) Proteins identified by each method were binned by molecular weight and plotted against their cumulative distribution. (C) Peptides identified by each method were binned according to their length and plotted against their cumulative distribution.

Supplemental Figure 2: Boxplot displaying the GRAVY scores of proteins identified by each method

Supplemental Figure 3: Boxplot displaying the sequence coverage of proteins identified by each method

Supplemental Information I. (separate excel file)  
Supplemental Table 1: Protein groups identified by MaxQuant  
Supplemental Table 2: Peptides identified by MaxQuant  
Supplemental Table 3: Proteosign analysis of LFQ data

Supplemental Table 4: Cellular compartments that were overrepresented in each data set were analyzed. Unique cellular compartments are shown for each method.

Supplemental Table 5: Biological processes that were overrepresented in each data set were analyzed. Unique biological processes are shown for each method.

**Figure S1.**  
**(A)**

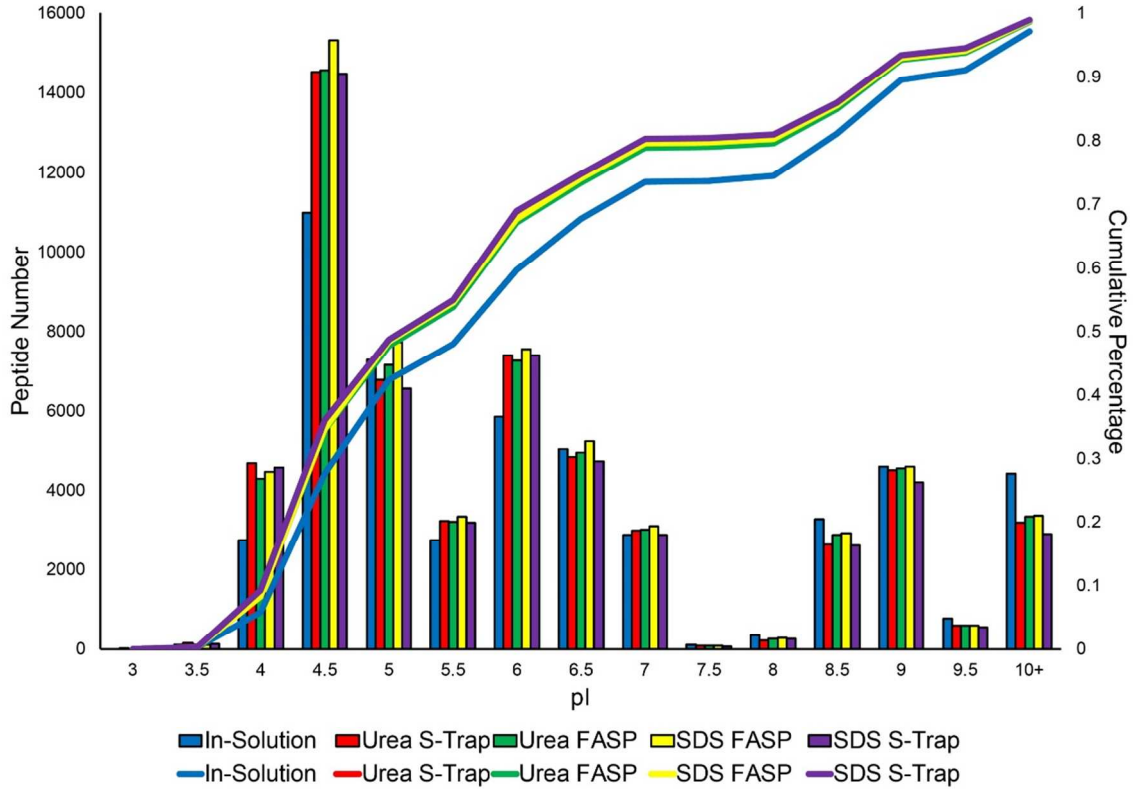

**(B)**

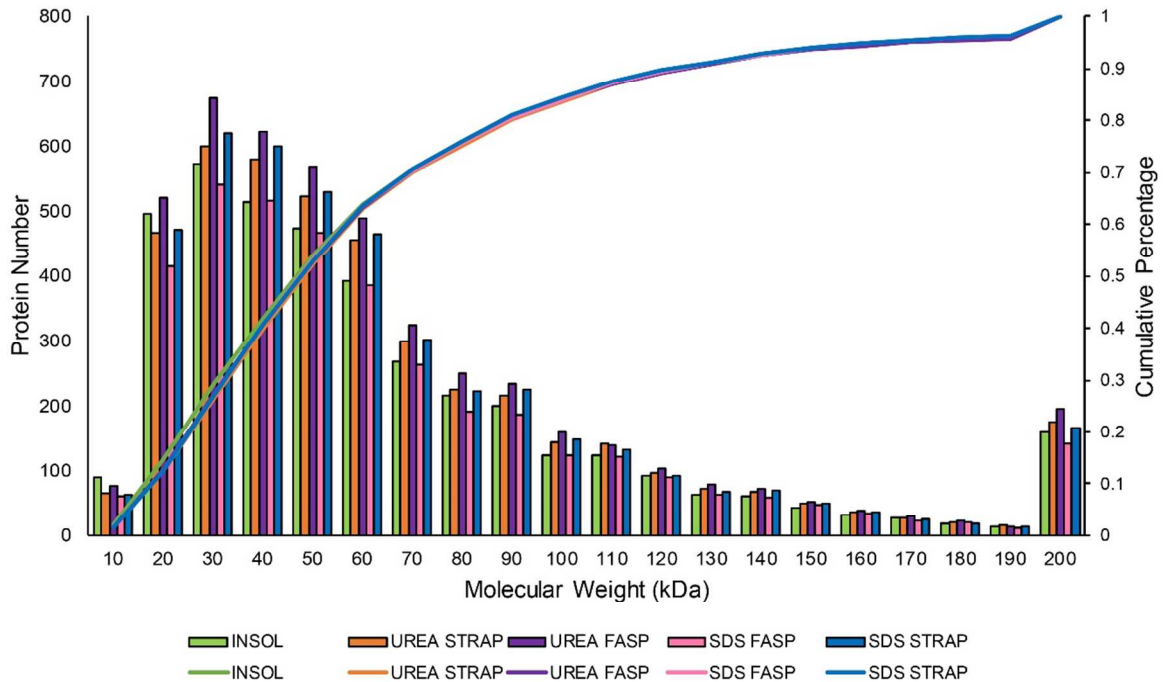

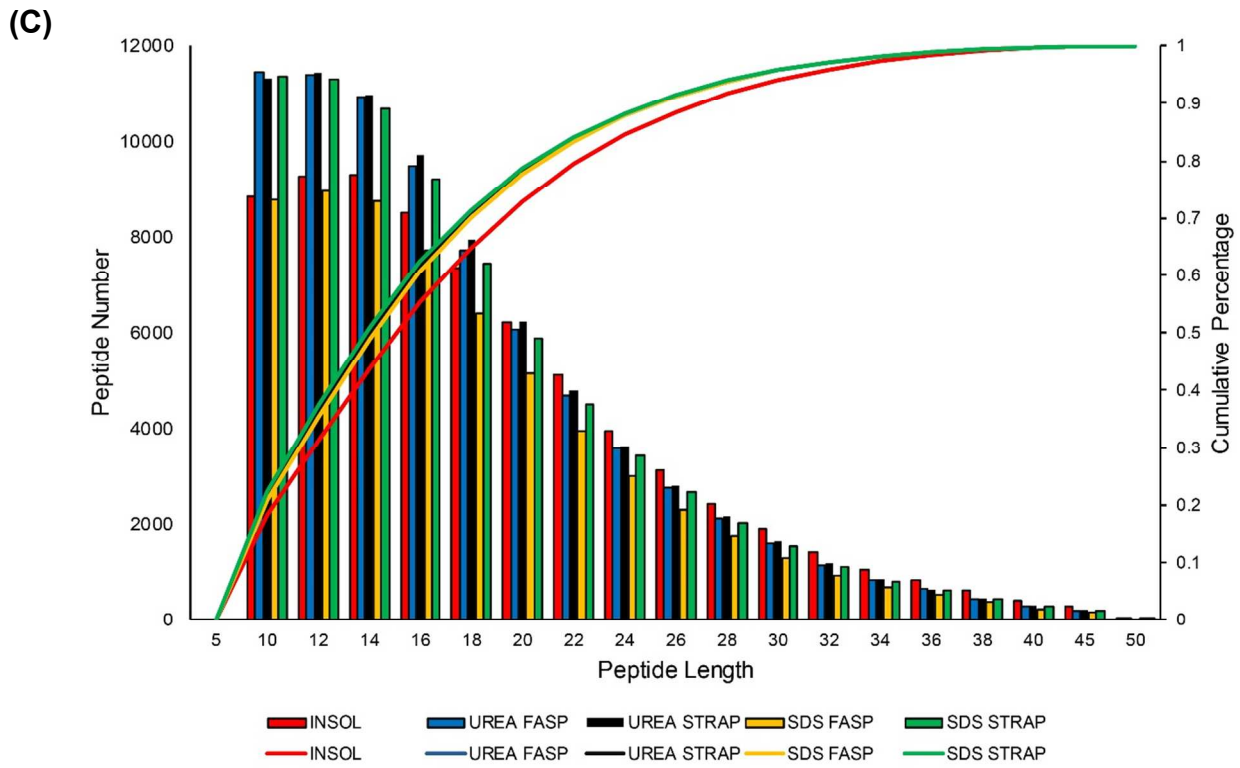

**Supplemental Figure 1:** Analysis of peptide trends. (A) Peptides were binned by isoelectric point and their cumulative distribution for each method was plotted. (B) Proteins identified by each method were binned by molecular weight and plotted against their cumulative distribution. (C) Peptides identified by each method were binned according to their length and plotted against their cumulative distribution.

**Figure S2**

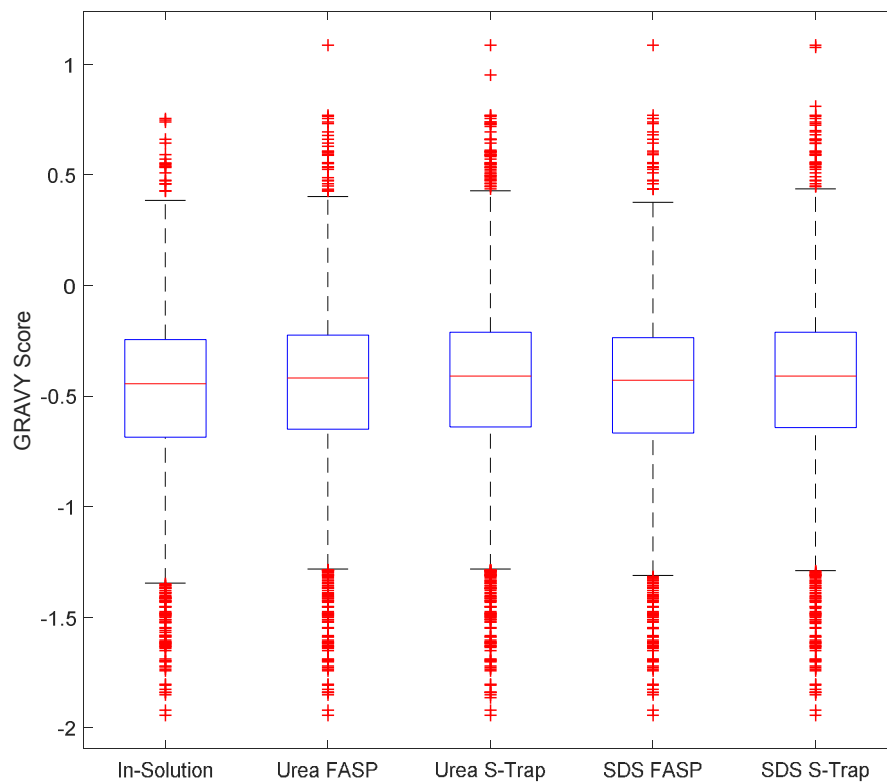

**Supplemental Figure 2:** Boxplot displaying the GRAVY scores of proteins identified by each method

**Figure S3**

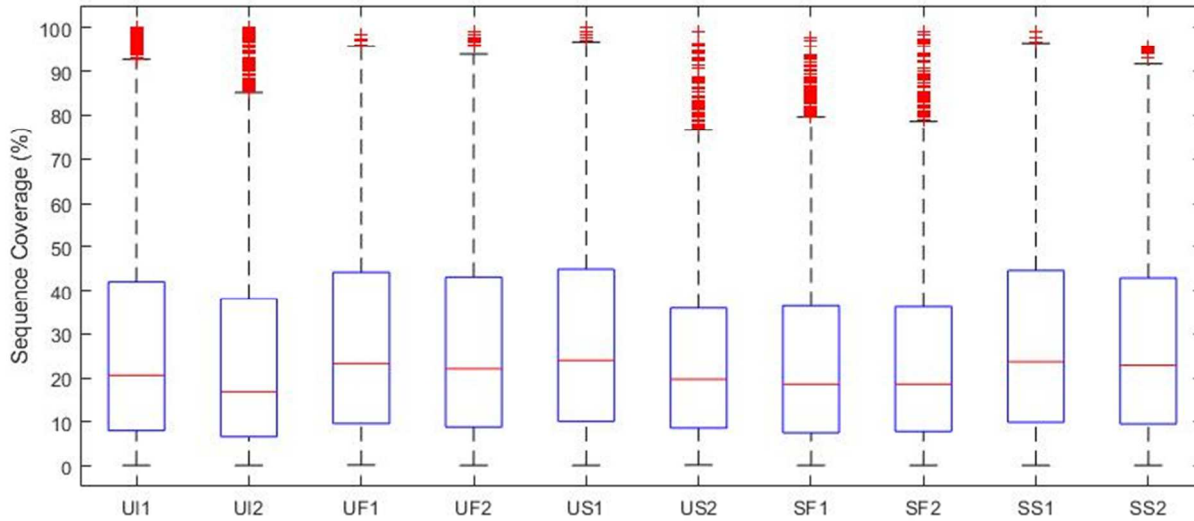

**Supplemental Figure 3:** Boxplot displaying the sequence coverage of proteins identified by

each method

**Table S4**

**Cellular Component**

| In-Solution CC                                                | # Molecules | P-Value  |
|---------------------------------------------------------------|-------------|----------|
| Fleming body                                                  | 7           | 1.00E-02 |
| Dynactin complex                                              | 7           | 1.00E-02 |
| Nuclear origin of replication recognition complex             | 7           | 2.30E-02 |
| ESCRT III complex                                             | 8           | 2.90E-02 |
| Vesicle membrane                                              | 11          | 4.10E-02 |
| Mitochondrial intermembrane space protein transporter complex | 5           | 4.70E-02 |

| Urea FASP CC                            | #Molecules | P-Value  |
|-----------------------------------------|------------|----------|
| Endoplasmic reticulum chaperone complex | 8          | 2.60E-02 |
| nBAF complex                            | 9          | 3.20E-02 |
| Exocyst                                 | 11         | 3.70E-02 |

| SDS FASP CC                    | #Molecules | P-Value  |
|--------------------------------|------------|----------|
| MCM complex                    | 7          | 1.80E-02 |
| Extracellular vesicle          | 19         | 2.60E-02 |
| Polysomal ribosome             | 6          | 2.70E-02 |
| Spliceosomal tri-snRNP complex | 5          | 3.90E-02 |
| mRNA cleavage factor complex   | 5          | 3.90E-02 |

| Urea S-Trap                                        | #Molecules | P-Value  |
|----------------------------------------------------|------------|----------|
| Integral component of mitochondrial outer membrane | 13         | 6.60E-03 |
| Desmosome                                          | 14         | 7.60E-03 |
| WASH complex                                       | 10         | 1.80E-02 |
| MICOS complex                                      | 7          | 2.10E-02 |
| Box C/D snoRNP complex                             | 6          | 2.40E-02 |
| Transcription factor TFIIC complex                 | 6          | 2.40E-02 |
| CCR4-NOT complex                                   | 10         | 3.00E-02 |
| Immunological synapse                              | 16         | 3.60E-02 |
| Spindle microtubule                                | 19         | 4.10E-02 |
| Swr1 complex                                       | 7          | 4.50E-02 |
| Extrinsic component of membrane                    | 30         | 4.70E-02 |
| Lysosome                                           | 69         | 4.70E-02 |
| Clathrin-coated vesicle                            | 23         | 4.80E-02 |

| SDS S-Trap CC                 | #Molecules | P-Value  |
|-------------------------------|------------|----------|
| cis-Golgi network             | 17         | 3.00E-02 |
| Cdc73/Paf1 complex            | 6          | 3.20E-02 |
| protein-DNA complex           | 12         | 3.30E-02 |
| ER to Golgi transport vesicle | 12         | 4.40E-02 |

Supplemental Table 4: Cellular compartments that were overrepresented in each data set were analyzed. Unique cellular compartments are shown for each method.

**Table S5**

**Biological Process**

| In-Solution BP                                                                                       | #Molecules | P-Value  | Urea S-Trap BP                                                                                | #Molecules | P-Value  | SDS S-Trap BP                                                                                                                    | #Molecules | P-Value  |
|------------------------------------------------------------------------------------------------------|------------|----------|-----------------------------------------------------------------------------------------------|------------|----------|----------------------------------------------------------------------------------------------------------------------------------|------------|----------|
| intrinsic apoptotic signaling pathway                                                                | 17         | 3.70E-03 | chaperone mediated protein folding requiring cofactor                                         | 9          | 1.30E-02 | histone monoubiquitination                                                                                                       | 10         | 1.30E-03 |
| cellular amino acid biosynthetic process                                                             | 15         | 8.40E-03 | endoplasmic reticulum organization                                                            | 16         | 1.80E-02 | 2-oxoglutarate metabolic process                                                                                                 | 12         | 8.60E-03 |
| microtubule nucleation                                                                               | 12         | 9.00E-03 | microvillus assembly                                                                          | 12         | 1.80E-02 | endosome to lysosome transport                                                                                                   | 19         | 1.20E-02 |
| positive regulation of DNA-templated transcription, elongation                                       | 9          | 1.20E-02 | DNA damage response, signal transduction by p53 class mediator resulting in cell cycle arrest | 28         | 2.30E-02 | protein targeting to ER                                                                                                          | 8          | 1.50E-02 |
| mitotic spindle assembly                                                                             | 18         | 1.30E-02 | epidermal growth factor receptor signaling pathway                                            | 26         | 2.30E-02 | negative regulation of release of cytochrome c from mitochondria                                                                 | 11         | 2.30E-02 |
| regulation of centrosome duplication                                                                 | 12         | 1.60E-02 | actin cytoskeleton organization                                                               | 49         | 2.60E-02 | exit from mitosis                                                                                                                | 9          | 2.60E-02 |
| regulation of mitotic spindle assembly                                                               | 10         | 1.90E-02 | protein targeting                                                                             | 20         | 2.70E-02 | regulation of proteasomal ubiquitin-dependent protein catabolic process                                                          | 9          | 2.60E-02 |
| regulation of DNA-templated transcription, elongation                                                | 10         | 1.90E-02 | snRNA processing                                                                              | 10         | 2.70E-02 | mitotic chromosome condensation                                                                                                  | 10         | 3.40E-02 |
| MAPK cascade                                                                                         | 78         | 1.90E-02 | establishment of endothelial intestinal barrier                                               | 9          | 3.30E-02 | histone H2B ubiquitination                                                                                                       | 7          | 4.90E-02 |
| DNA biosynthetic process                                                                             | 14         | 2.90E-02 | positive regulation of RNA polymerase II transcriptional preinitiation complex assembly       | 8          | 3.70E-02 | exonucleolytic trimming to generate mature 3'-end of 5.8S rRNA from tricistronic rRNA transcript (SSU-rRNA, 5.8S rRNA, LSU-rRNA) | 7          | 4.90E-02 |
| Epigenetic regulation of gene expression                                                             | 25         | 3.10E-02 | protein oligomerization                                                                       | 26         | 3.80E-02 |                                                                                                                                  |            |          |
| histone H3-K4 trimethylation                                                                         | 10         | 3.50E-02 | histone deacetylation                                                                         | 22         | 3.90E-02 |                                                                                                                                  |            |          |
| mitotic nuclear envelope reassembly                                                                  | 8          | 3.60E-02 | positive regulation of cell growth                                                            | 34         | 4.60E-02 |                                                                                                                                  |            |          |
| DNA-dependent DNA replication                                                                        | 11         | 4.00E-02 | peptidyl-threonine phosphorylation                                                            | 19         | 4.90E-02 |                                                                                                                                  |            |          |
|                                                                                                      |            |          |                                                                                               |            |          |                                                                                                                                  |            |          |
| Urea FASP BP                                                                                         | #Molecules | P-Value  | SDS FASP BP                                                                                   | #Molecules | P-Value  |                                                                                                                                  |            |          |
| macroautophagy                                                                                       | 35         | 1.30E-03 | oxidative phosphorylation                                                                     | 11         | 8.20E-04 |                                                                                                                                  |            |          |
| apoptotic mitochondrial changes                                                                      | 13         | 8.80E-03 | rRNA modification                                                                             | 15         | 9.20E-03 |                                                                                                                                  |            |          |
| covalent chromatin modification                                                                      | 44         | 9.60E-03 | mRNA cleavage                                                                                 | 9          | 2.10E-02 |                                                                                                                                  |            |          |
| response to cadmium ion                                                                              | 15         | 1.50E-02 | protein folding in endoplasmic reticulum                                                      | 9          | 4.20E-02 |                                                                                                                                  |            |          |
| positive regulation of telomere maintenance                                                          | 9          | 2.40E-02 | platelet aggregation                                                                          | 18         | 4.50E-02 |                                                                                                                                  |            |          |
| establishment or maintenance of cell polarity                                                        | 16         | 2.60E-02 | positive regulation of proteasomal protein catabolic process                                  | 10         | 4.80E-02 |                                                                                                                                  |            |          |
| positive regulation of substrate adhesion-dependent cell spreading                                   | 17         | 2.80E-02 |                                                                                               |            |          |                                                                                                                                  |            |          |
| endosome organization                                                                                | 17         | 2.80E-02 |                                                                                               |            |          |                                                                                                                                  |            |          |
| regulation of nucleic acid-templated transcription                                                   | 11         | 2.90E-02 |                                                                                               |            |          |                                                                                                                                  |            |          |
| positive regulation of transcription of nuclear large rRNA transcript from RNA polymerase I promoter | 7          | 2.90E-02 |                                                                                               |            |          |                                                                                                                                  |            |          |
| regulation of mitophagy                                                                              | 17         | 3.90E-02 |                                                                                               |            |          |                                                                                                                                  |            |          |
| transcription initiation from RNA polymerase I promoter                                              | 17         | 3.90E-02 |                                                                                               |            |          |                                                                                                                                  |            |          |
| telomere maintenance                                                                                 | 18         | 4.00E-02 |                                                                                               |            |          |                                                                                                                                  |            |          |
| toxin transport                                                                                      | 18         | 4.00E-02 |                                                                                               |            |          |                                                                                                                                  |            |          |

Supplemental Table 5: Biological processes that were overrepresented in each data set were analyzed. Unique biological processes are shown for each method.
